# Supplementary material
Source: publisher figshare collection journal article supplement (https://acs.figshare.com/ndownloader/files/15733688)
Supplement: Supplementary file 1 [file 15733688]

Supporting Information

**Enhancing the intrinsic stretchability of micropatterned gold film by covalent linkage of carbon nanotubes for wearable electronics**

*Xiaoli Zhao,<sup>†</sup> Shuo Yang,<sup>†</sup> Zijing Sun, Nan Cui, Pengfei Zhao, Qingxin Tang,\**

*Yanhong Tong,\* and Yichun Liu\**

Center for Advanced Optoelectronic Functional Materials Research, and Key Lab of UV-Emitting Materials and Technology of Ministry of Education, Northeast Normal University, 5268 Renmin Street, Changchun 130024, China

<sup>†</sup> These authors contributed equally to this work.

\* Corresponding author. Tel.: +86-431-85099873; fax: +86-431-85099873.

*E-mail address:* tangqx@nenu.edu.cn (Q. Tang); tongyh@nenu.edu.cn (Y. Tong);

ycliu@nenu.edu.cn (Y. Liu).

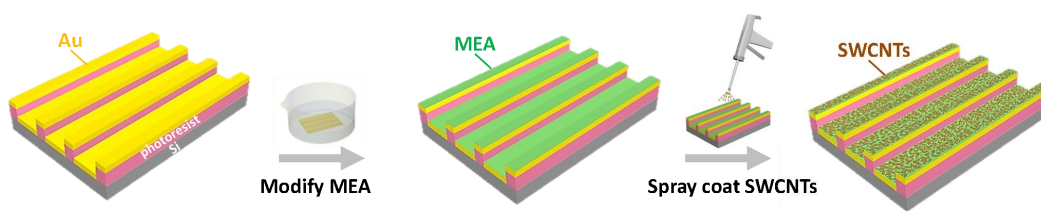

**Figure S1.** Schematic images of MEA and SWCNTs modification. After depositing Au film, the sample was immersed into MEA water solution ( $5 \text{ mg mL}^{-1}$ ) for 15 min at room temperature. Then the SWCNT aqueous dispersion ( $0.15 \text{ mg mL}^{-1}$ ) was sprayed coat to form the dense SWCNTs network on the MEA modified Au.

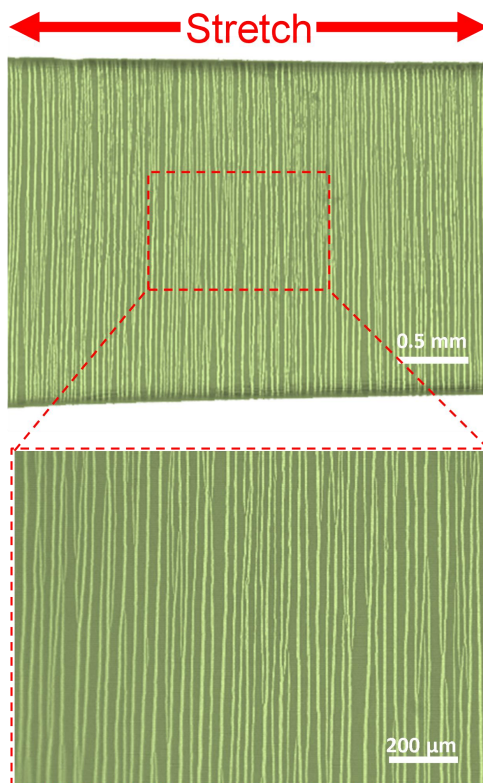

**Figure S2.** Optical microscopic images of 3 mm-wide Au film at tensile strain of 96%. Cracks have pass through the entire width of the track, leading to the poor electrical conductivity.

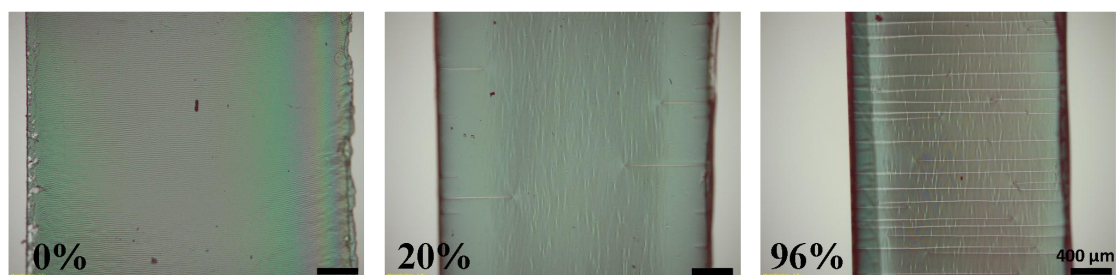

**Figure S3.** Optical microscopic images of Au film at different tensile strains.

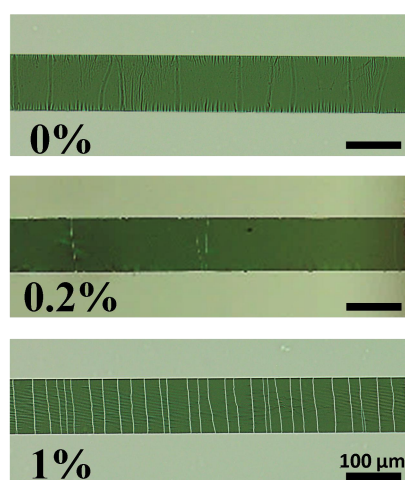

**Figure S4.** Optical microscopic images of Au pattern electrode at different tensile strains.

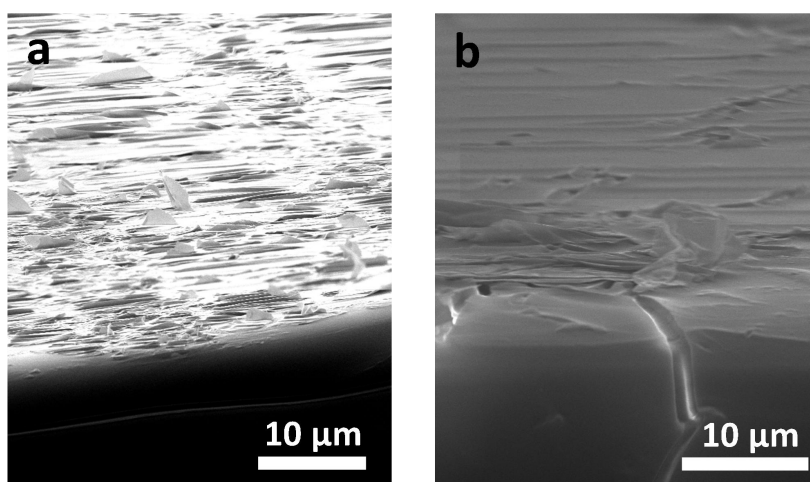

**Figure S5.** SEM cross-sectional view of Au/SWCNTs hybrid electrodes with and without MEA modification at 150% tensile strain.

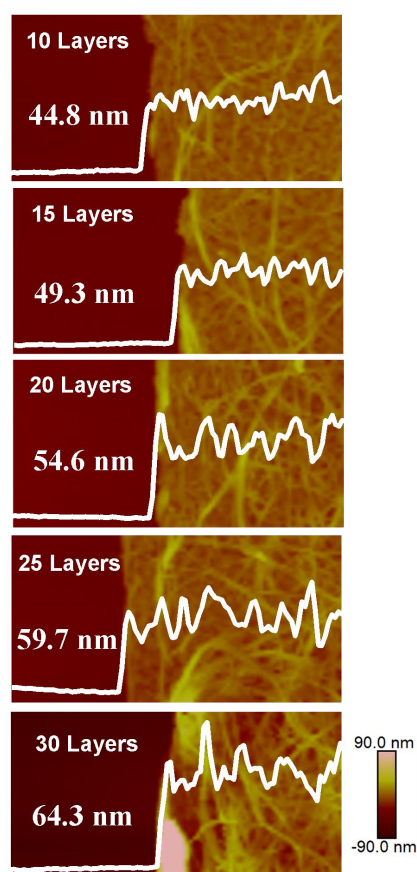

**Figure S6.** Thickness of carbon nanotube with different sprayed layers.

**Table S1.** Electrode thickness with different number of sprayed carbon nanotube layers.

| Layers | t/nm (Au+SWCNTs) | t/nm (SWCNTs) |
|--------|------------------|---------------|
| 10     | 44.8             | 19.8          |
| 15     | 49.3             | 24.3          |
| 20     | 54.6             | 29.6          |
| 25     | 59.7             | 34.7          |
| 30     | 64.3             | 39.3          |

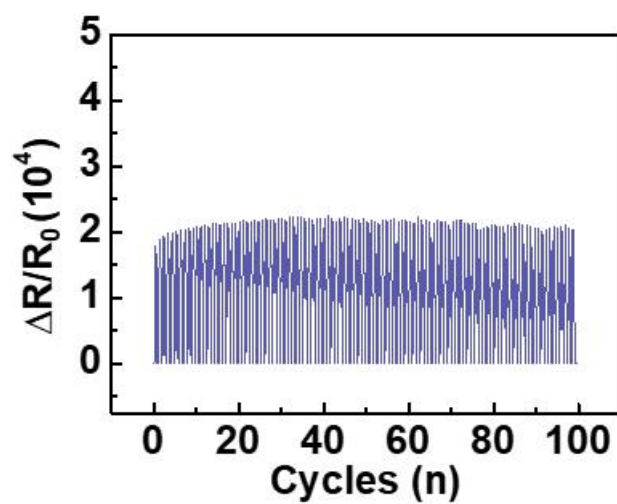

**Figure S7.** Durability tests of the stretchable micropatterned Au/SWCNTs electrode during 100 cycles at 50% strain with a continuous loading/unloading force.
